# Supplementary figures and images for: A loss-of-function RNA interference screen for molecular targets in cancer
Source: Springer Nature journal article supplement (doi:10.1038/nature04687), 2006-03-29

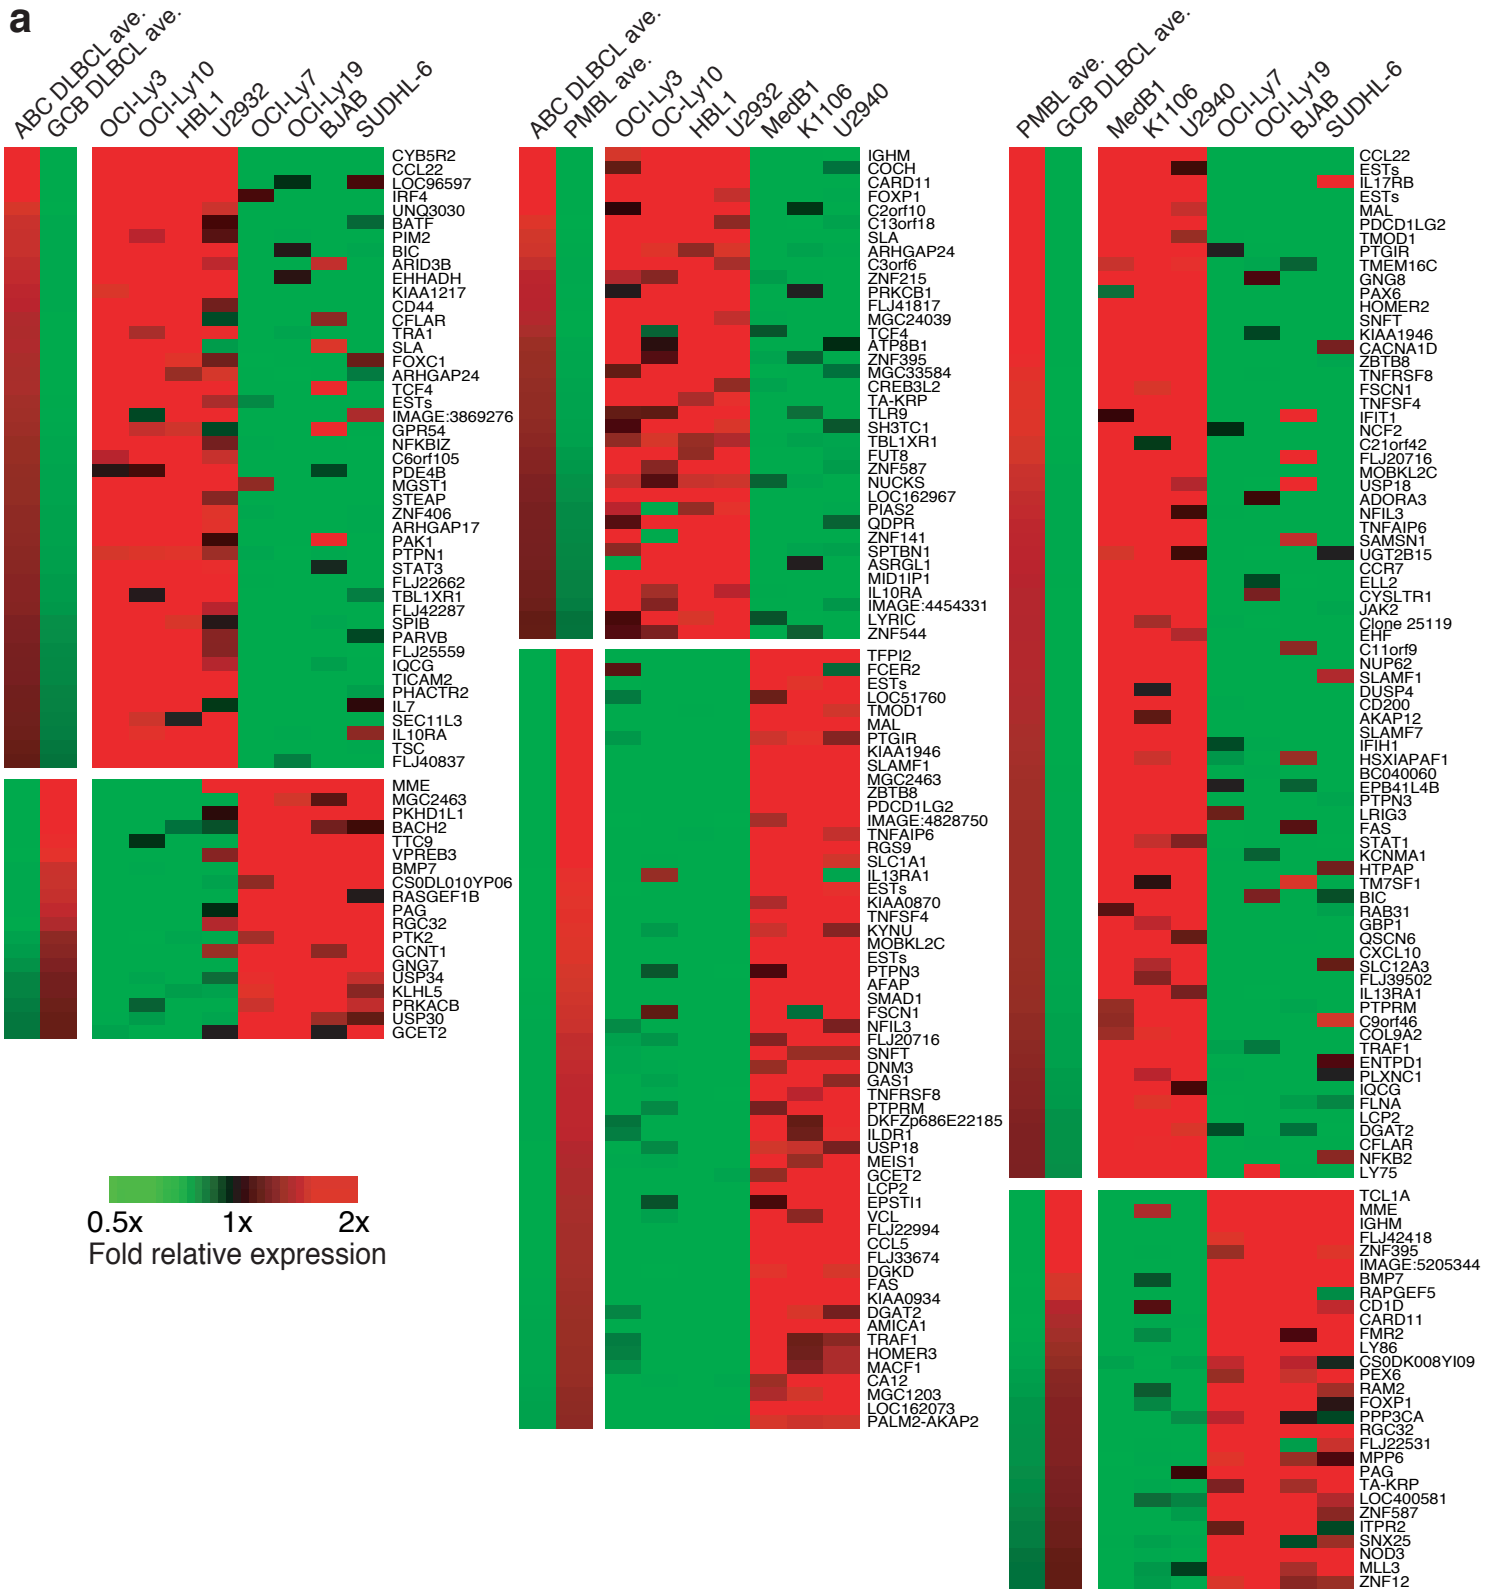

Supplement: nature04687-s3.pdf [file nature04687-s3.pdf]
